# Supplementary material
Source: ML conference proceedings conference paper supplement (https://openreview.net/forum?id=0ApkwFlCxq)

# AA1 - MBD

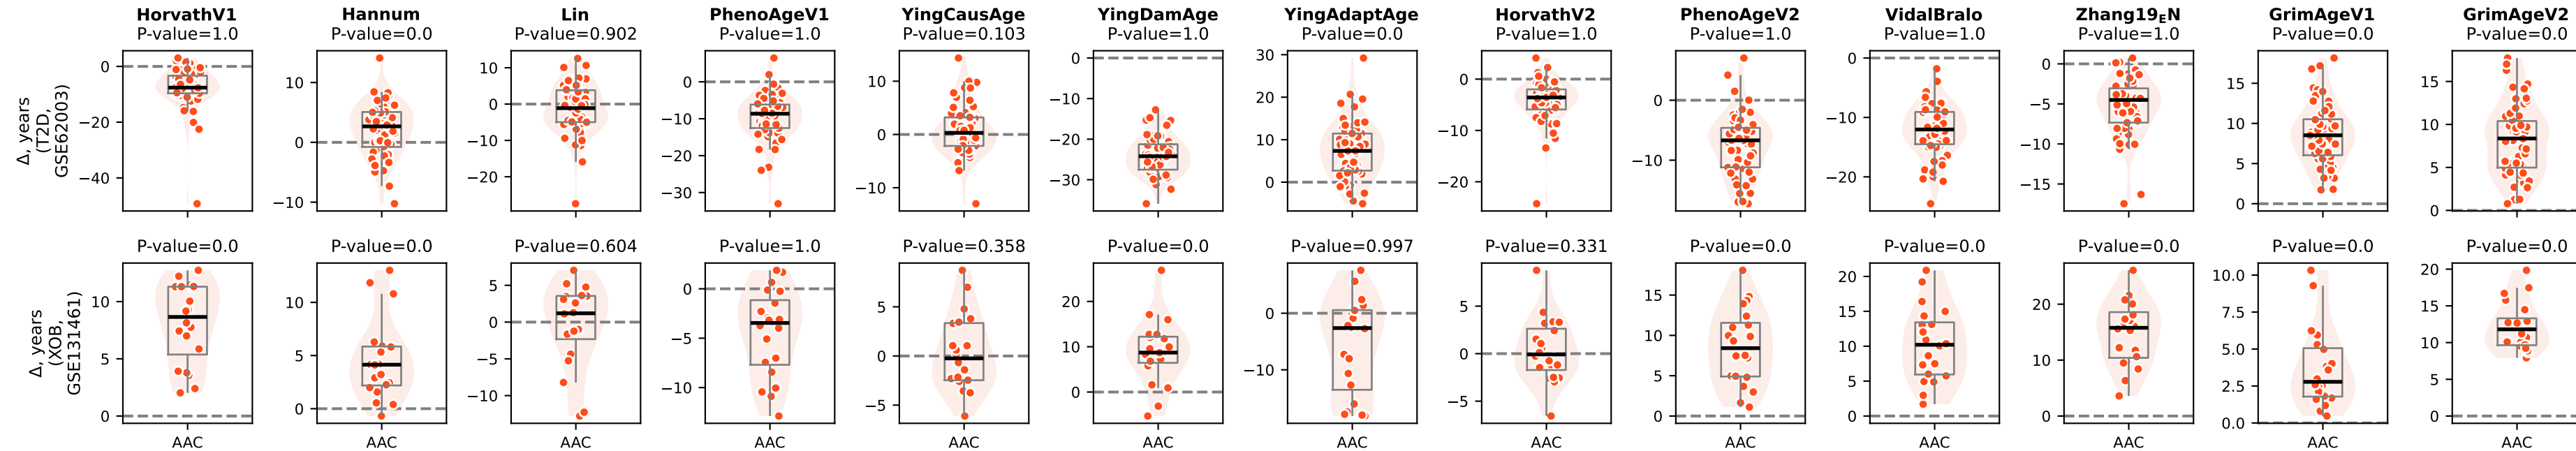

Supplement: supplementary_material [file attachment]

# AA2 - MBD

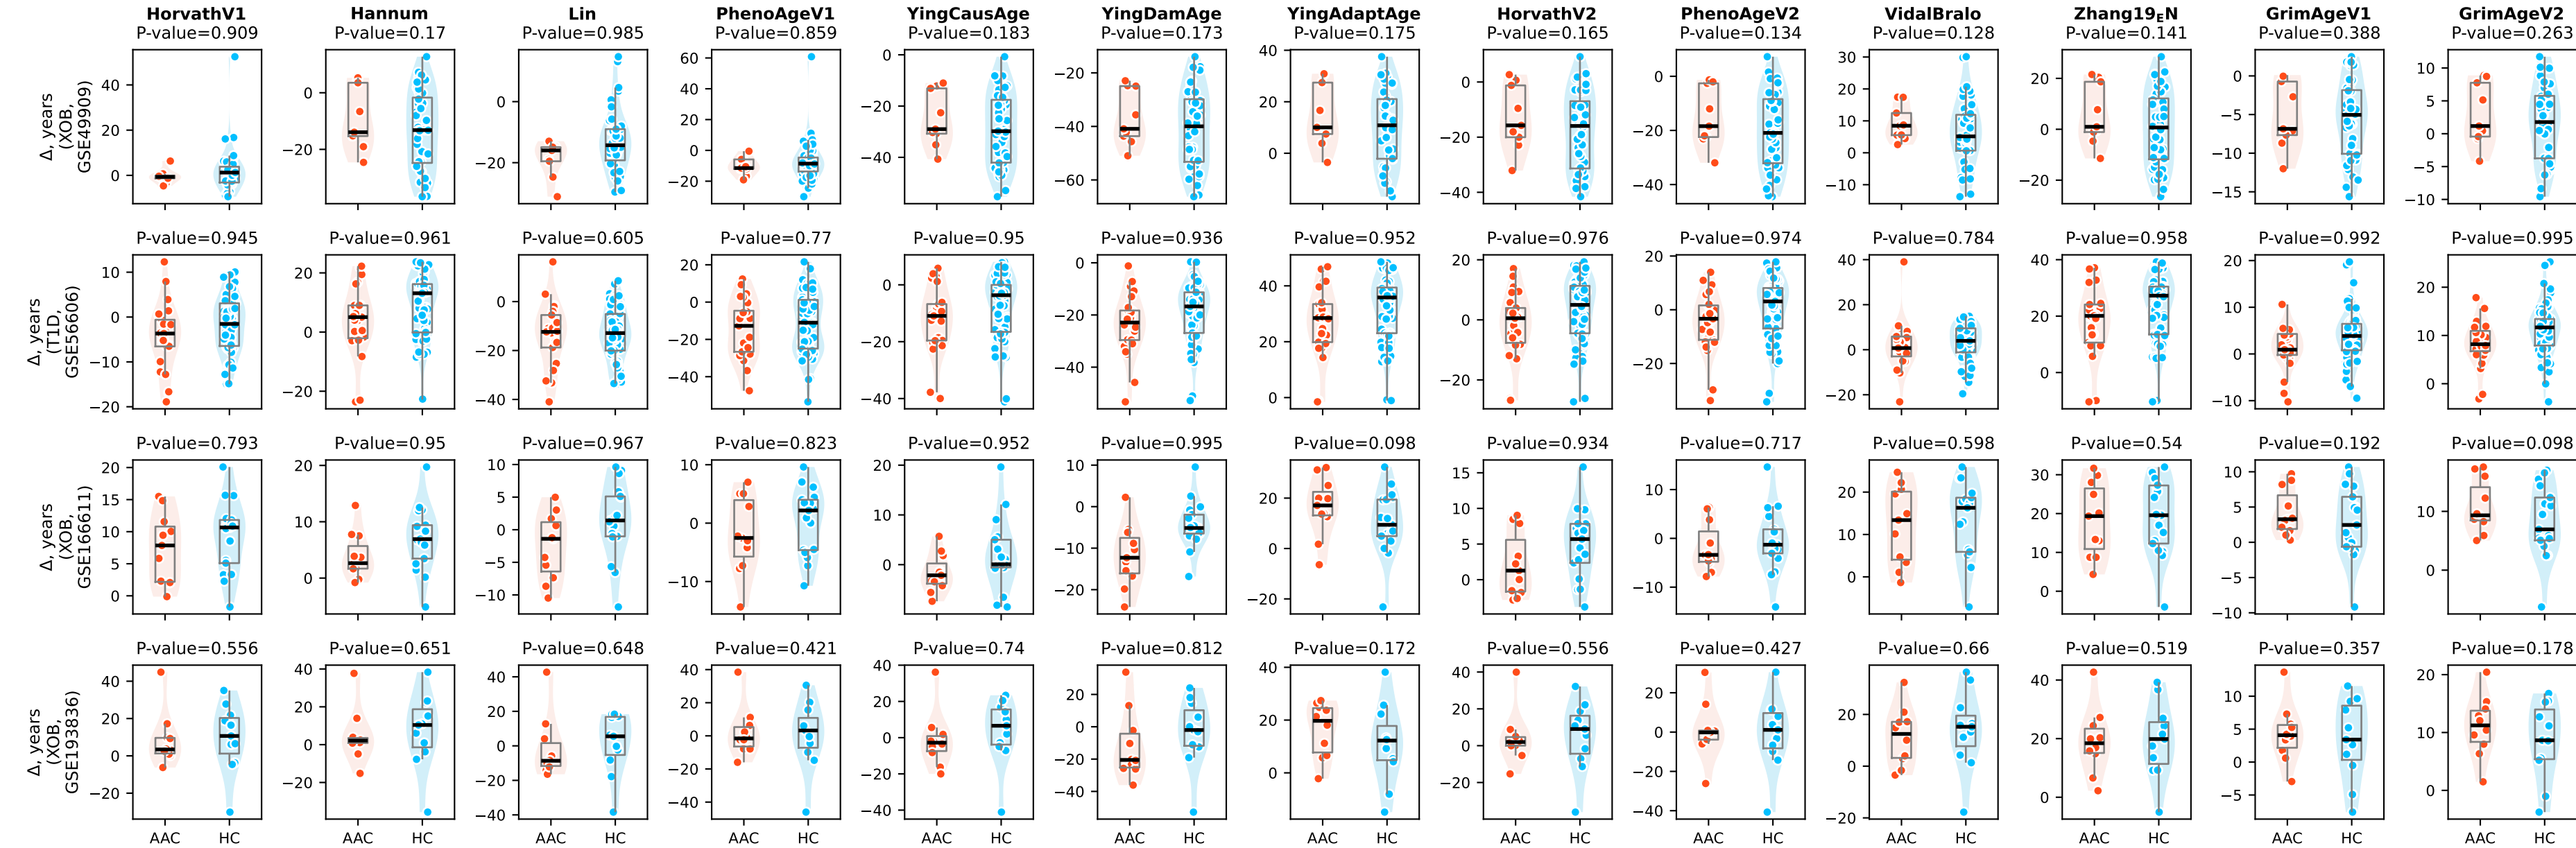

Supplement: supplementary_material [file attachment]

# AA2 - RSD

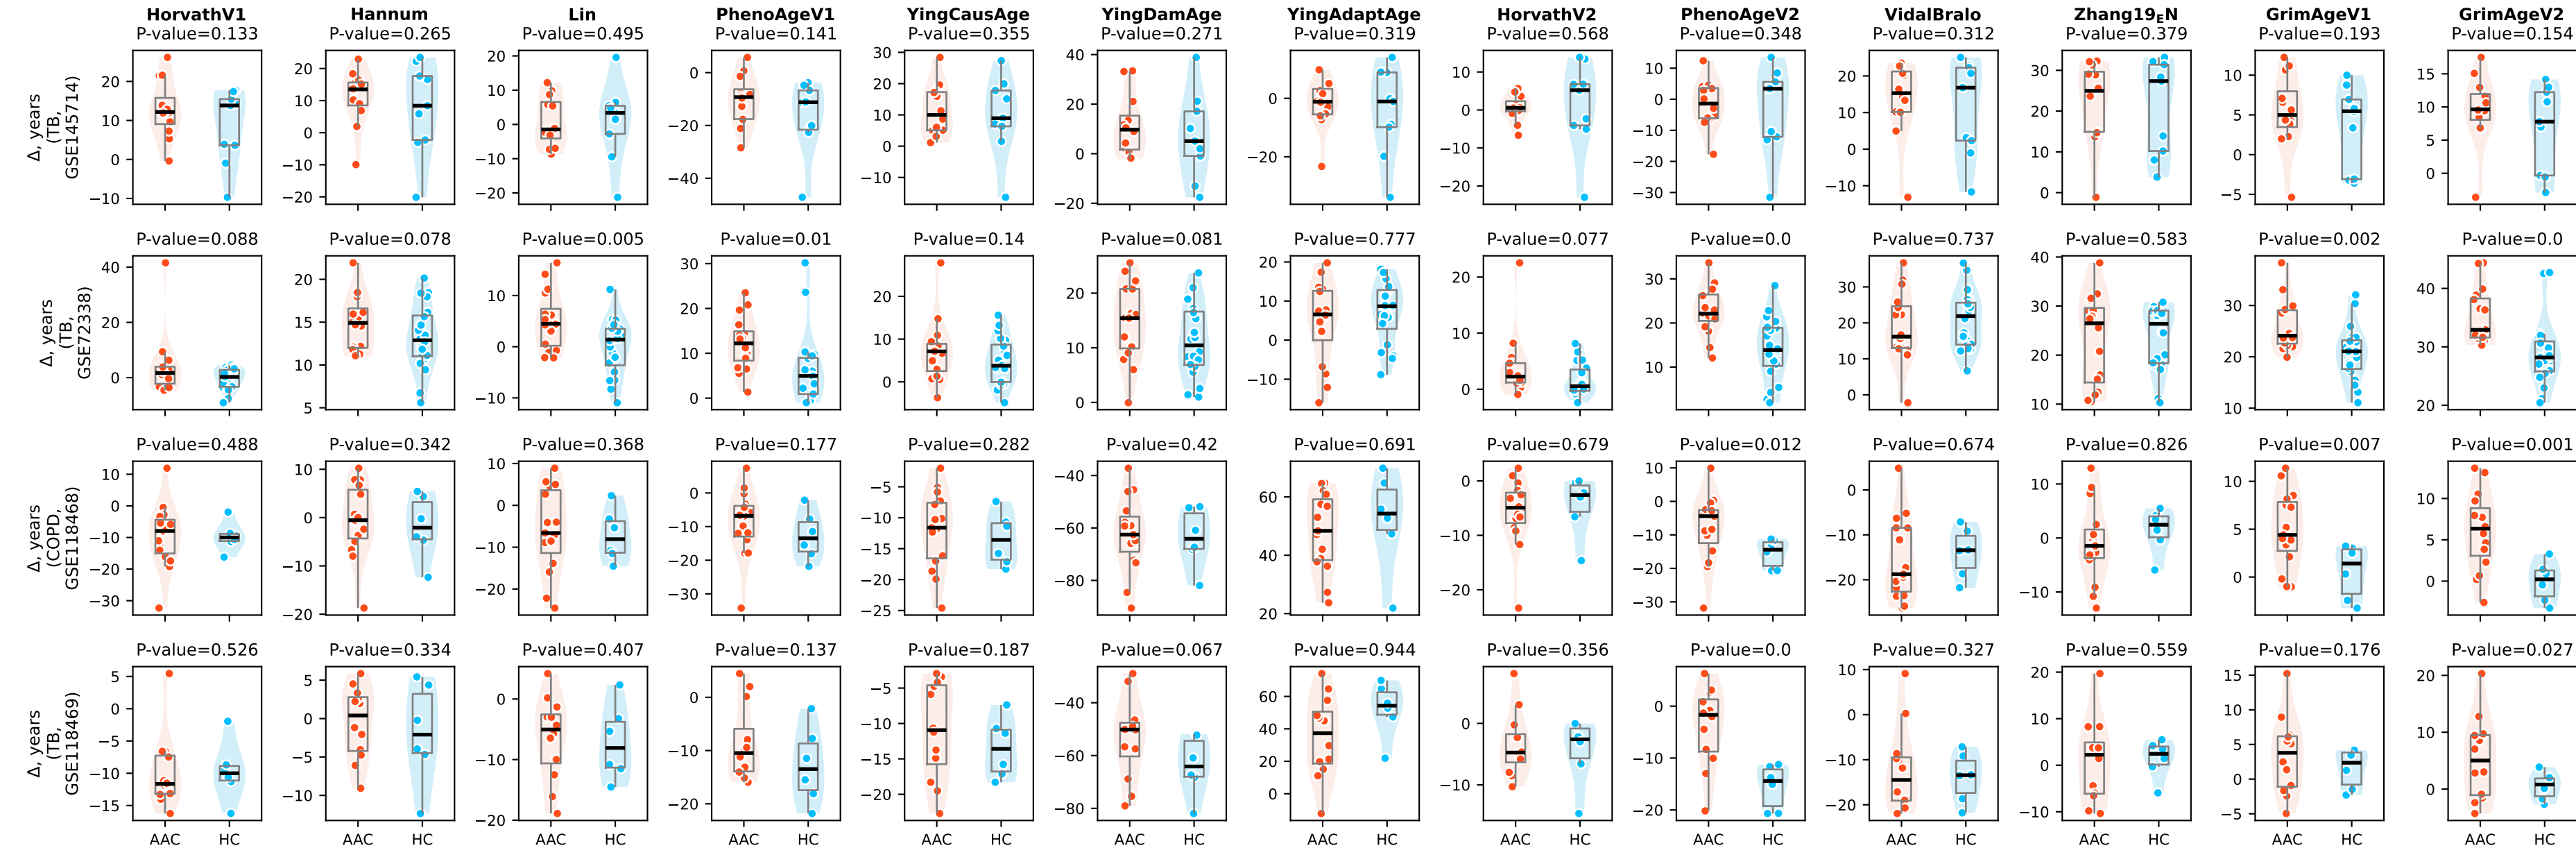

Supplement: supplementary_material [file attachment]

# AA2 - MSD

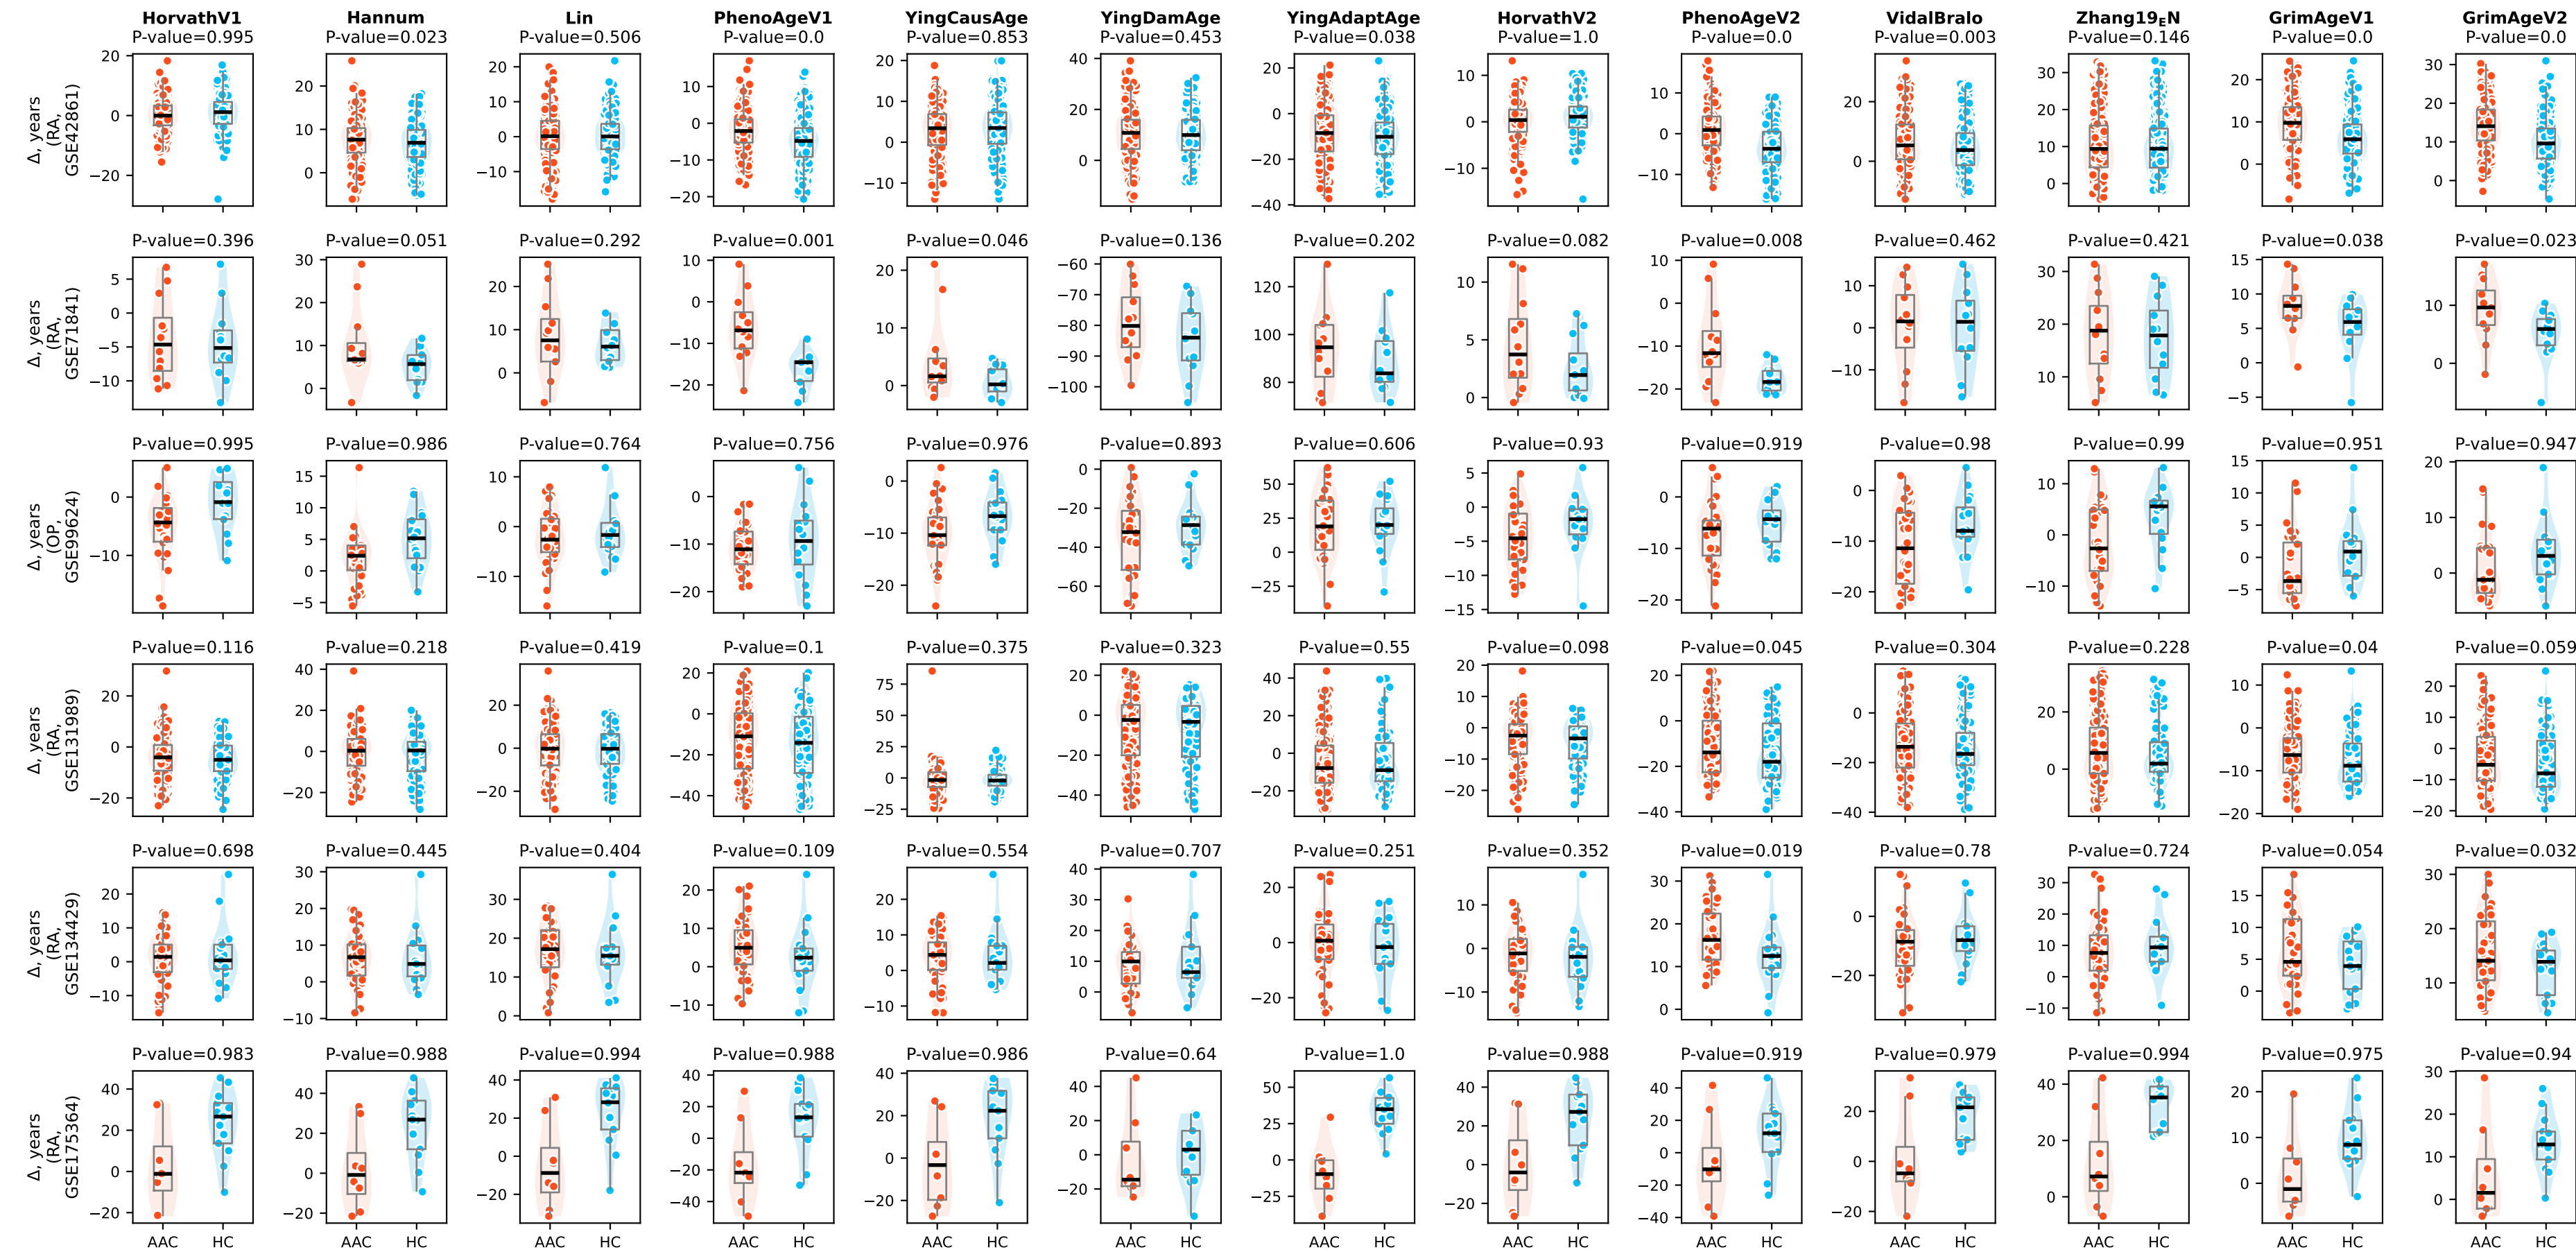

Supplement: supplementary_material [file attachment]

# AA2 - LUD

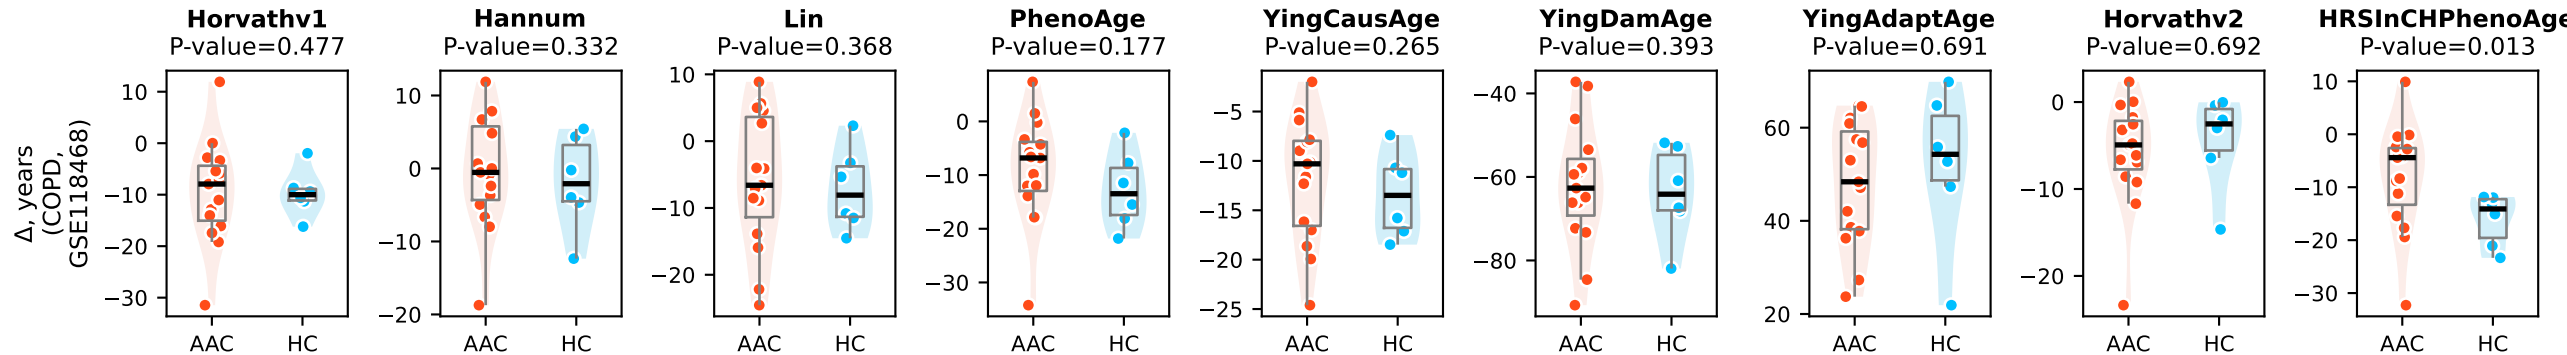

Supplement: supplementary_material [file attachment]

# AA1 - MSD

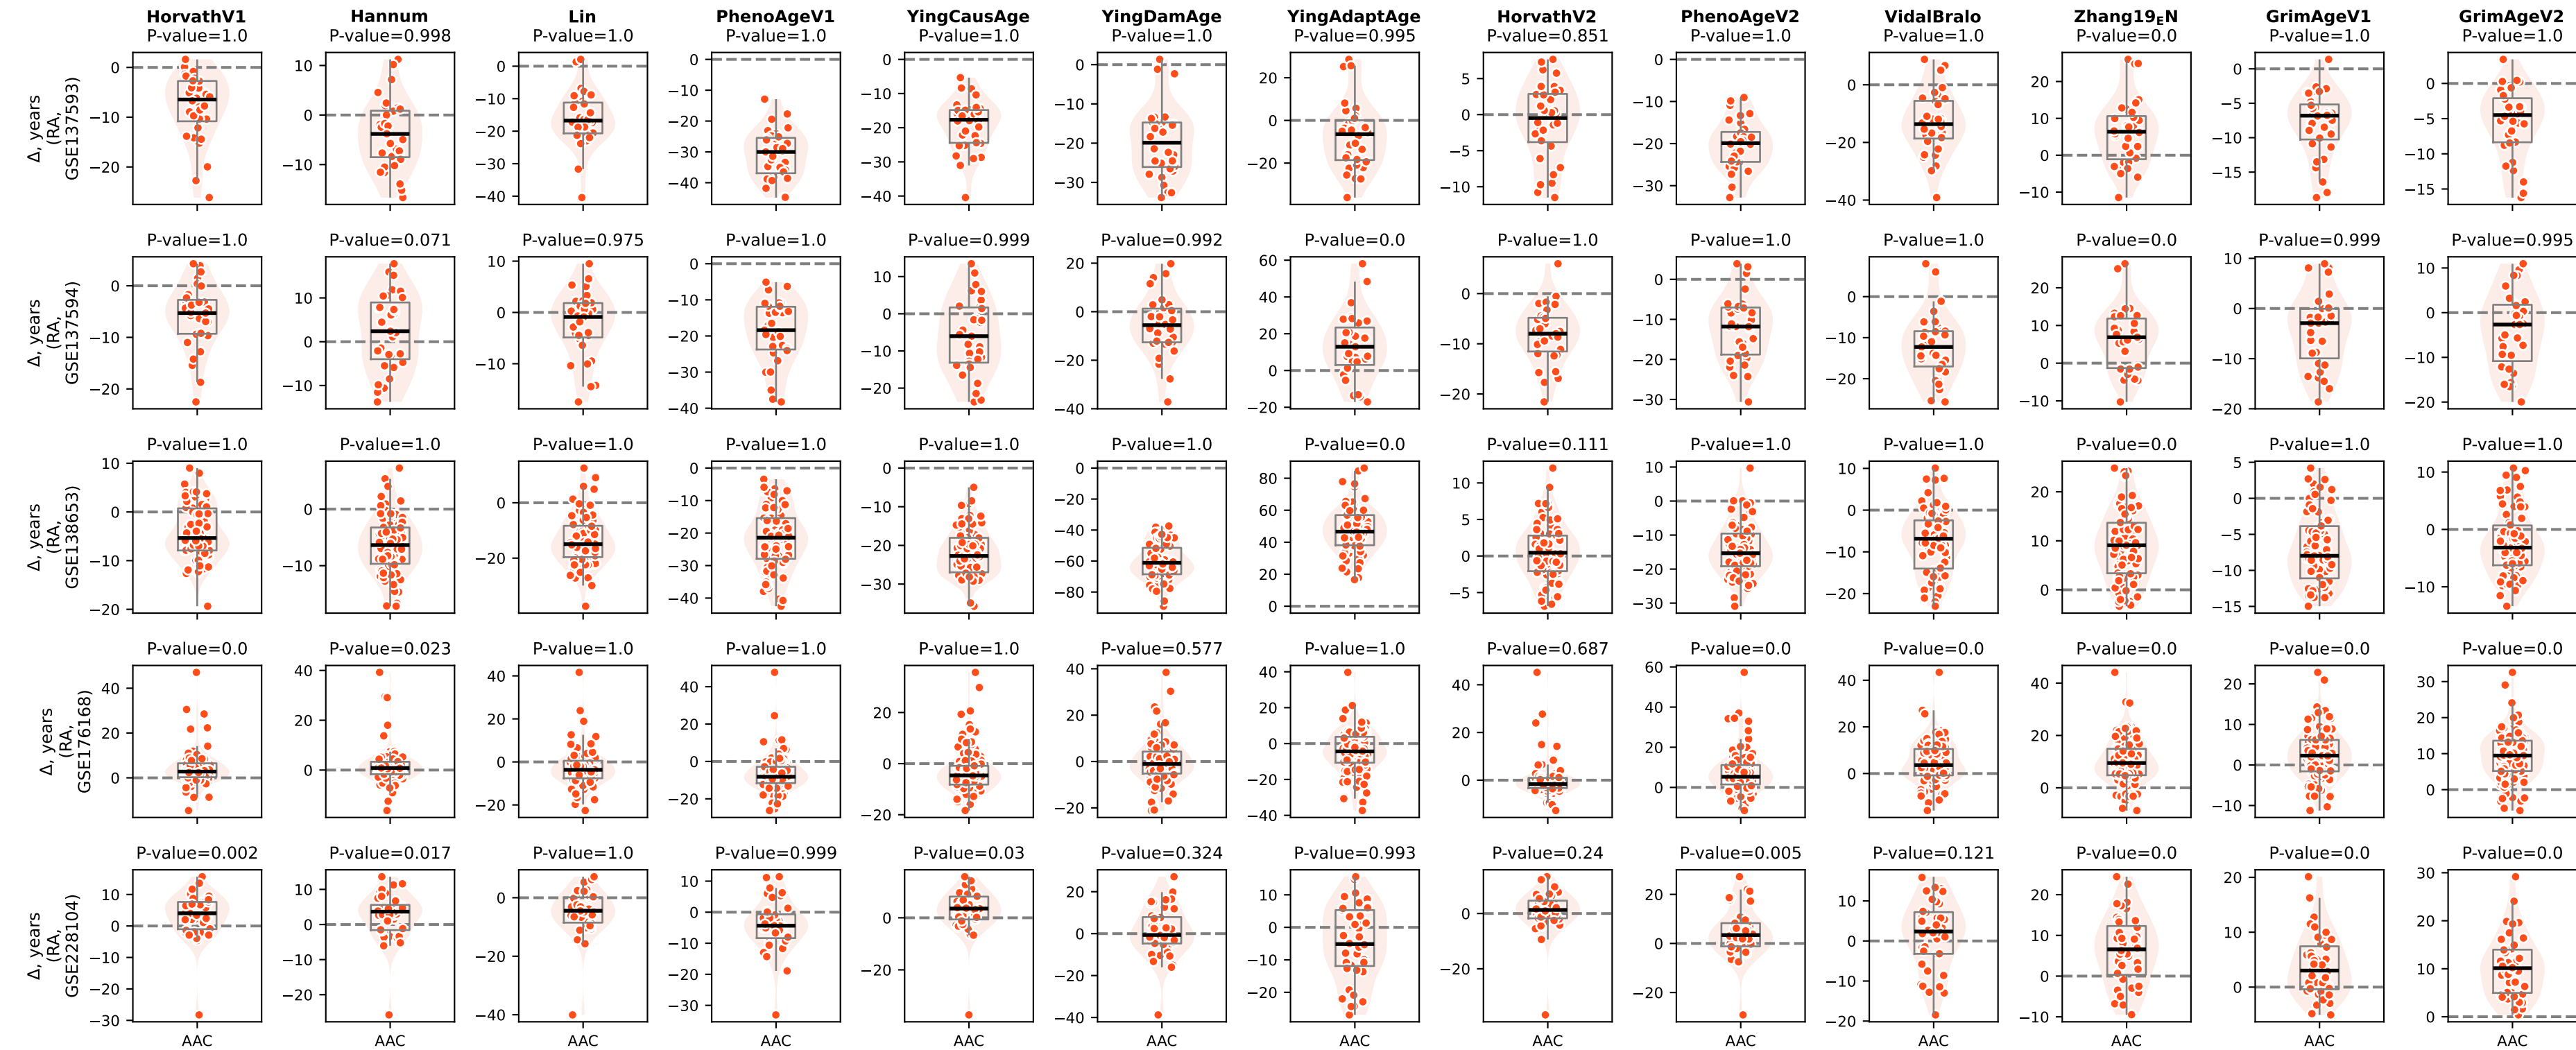

Supplement: supplementary_material [file attachment]

# AA2 - NDD

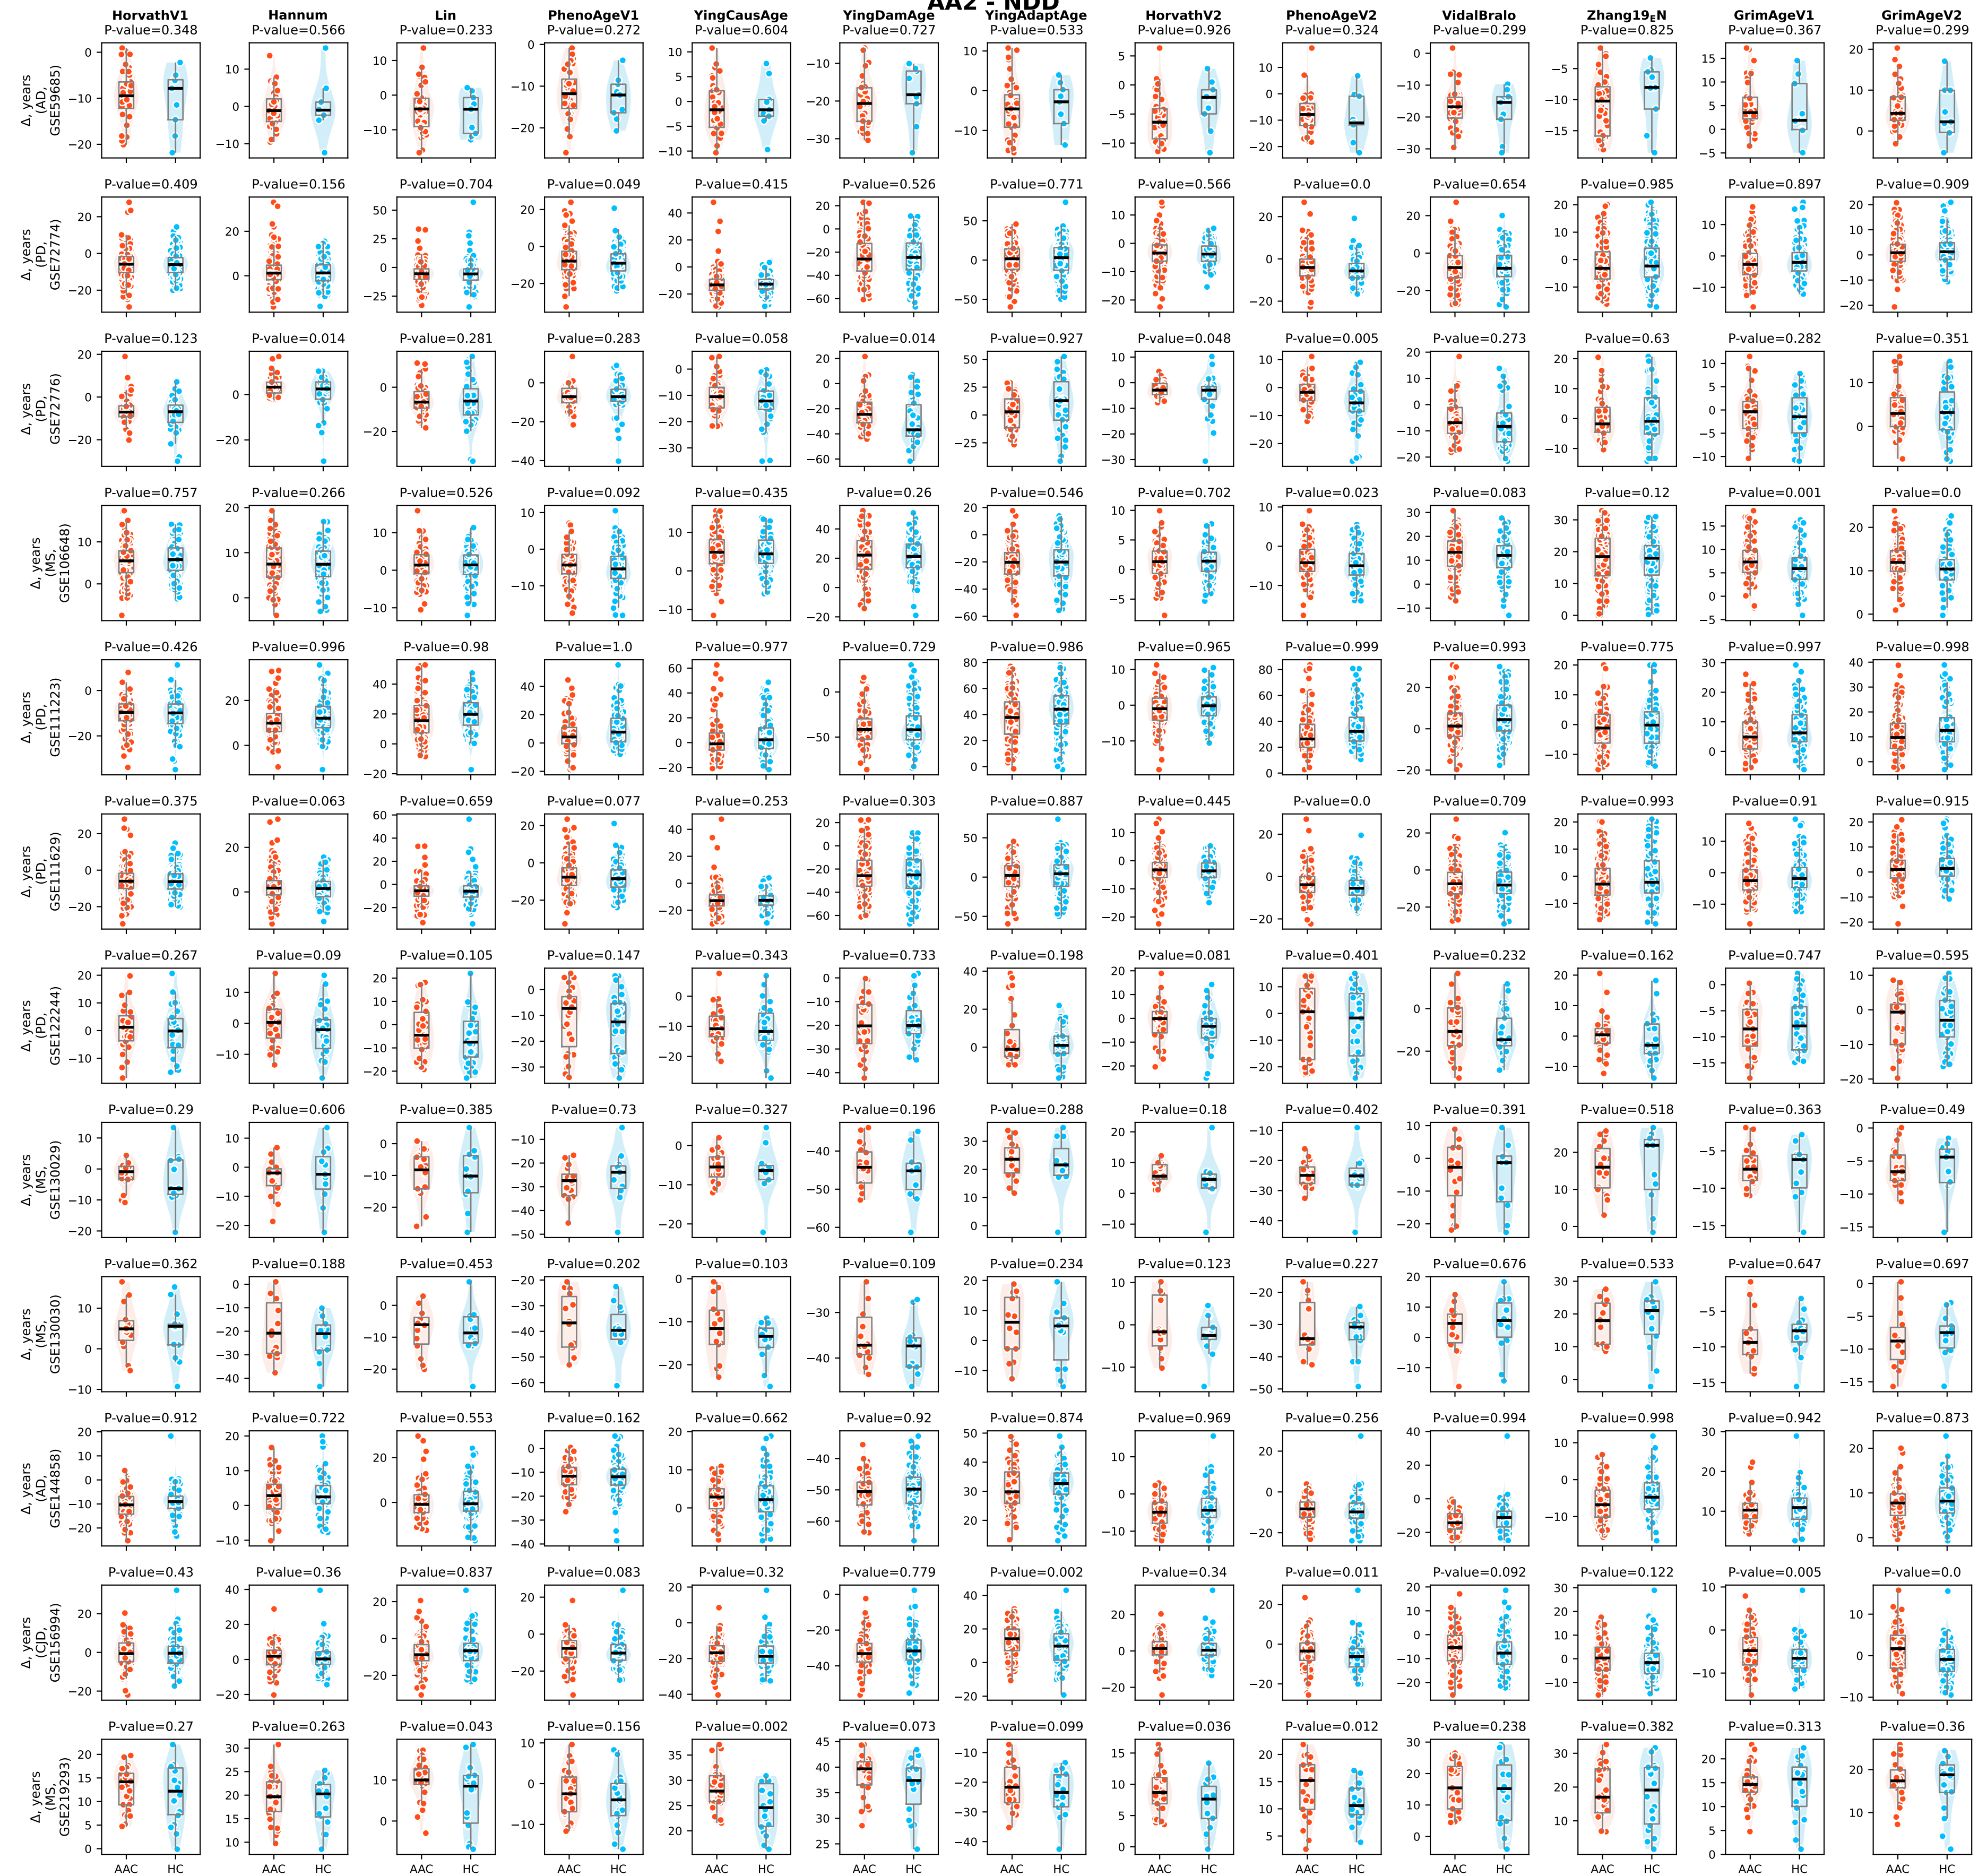

Supplement: supplementary_material [file attachment]

# AA1 - NDD

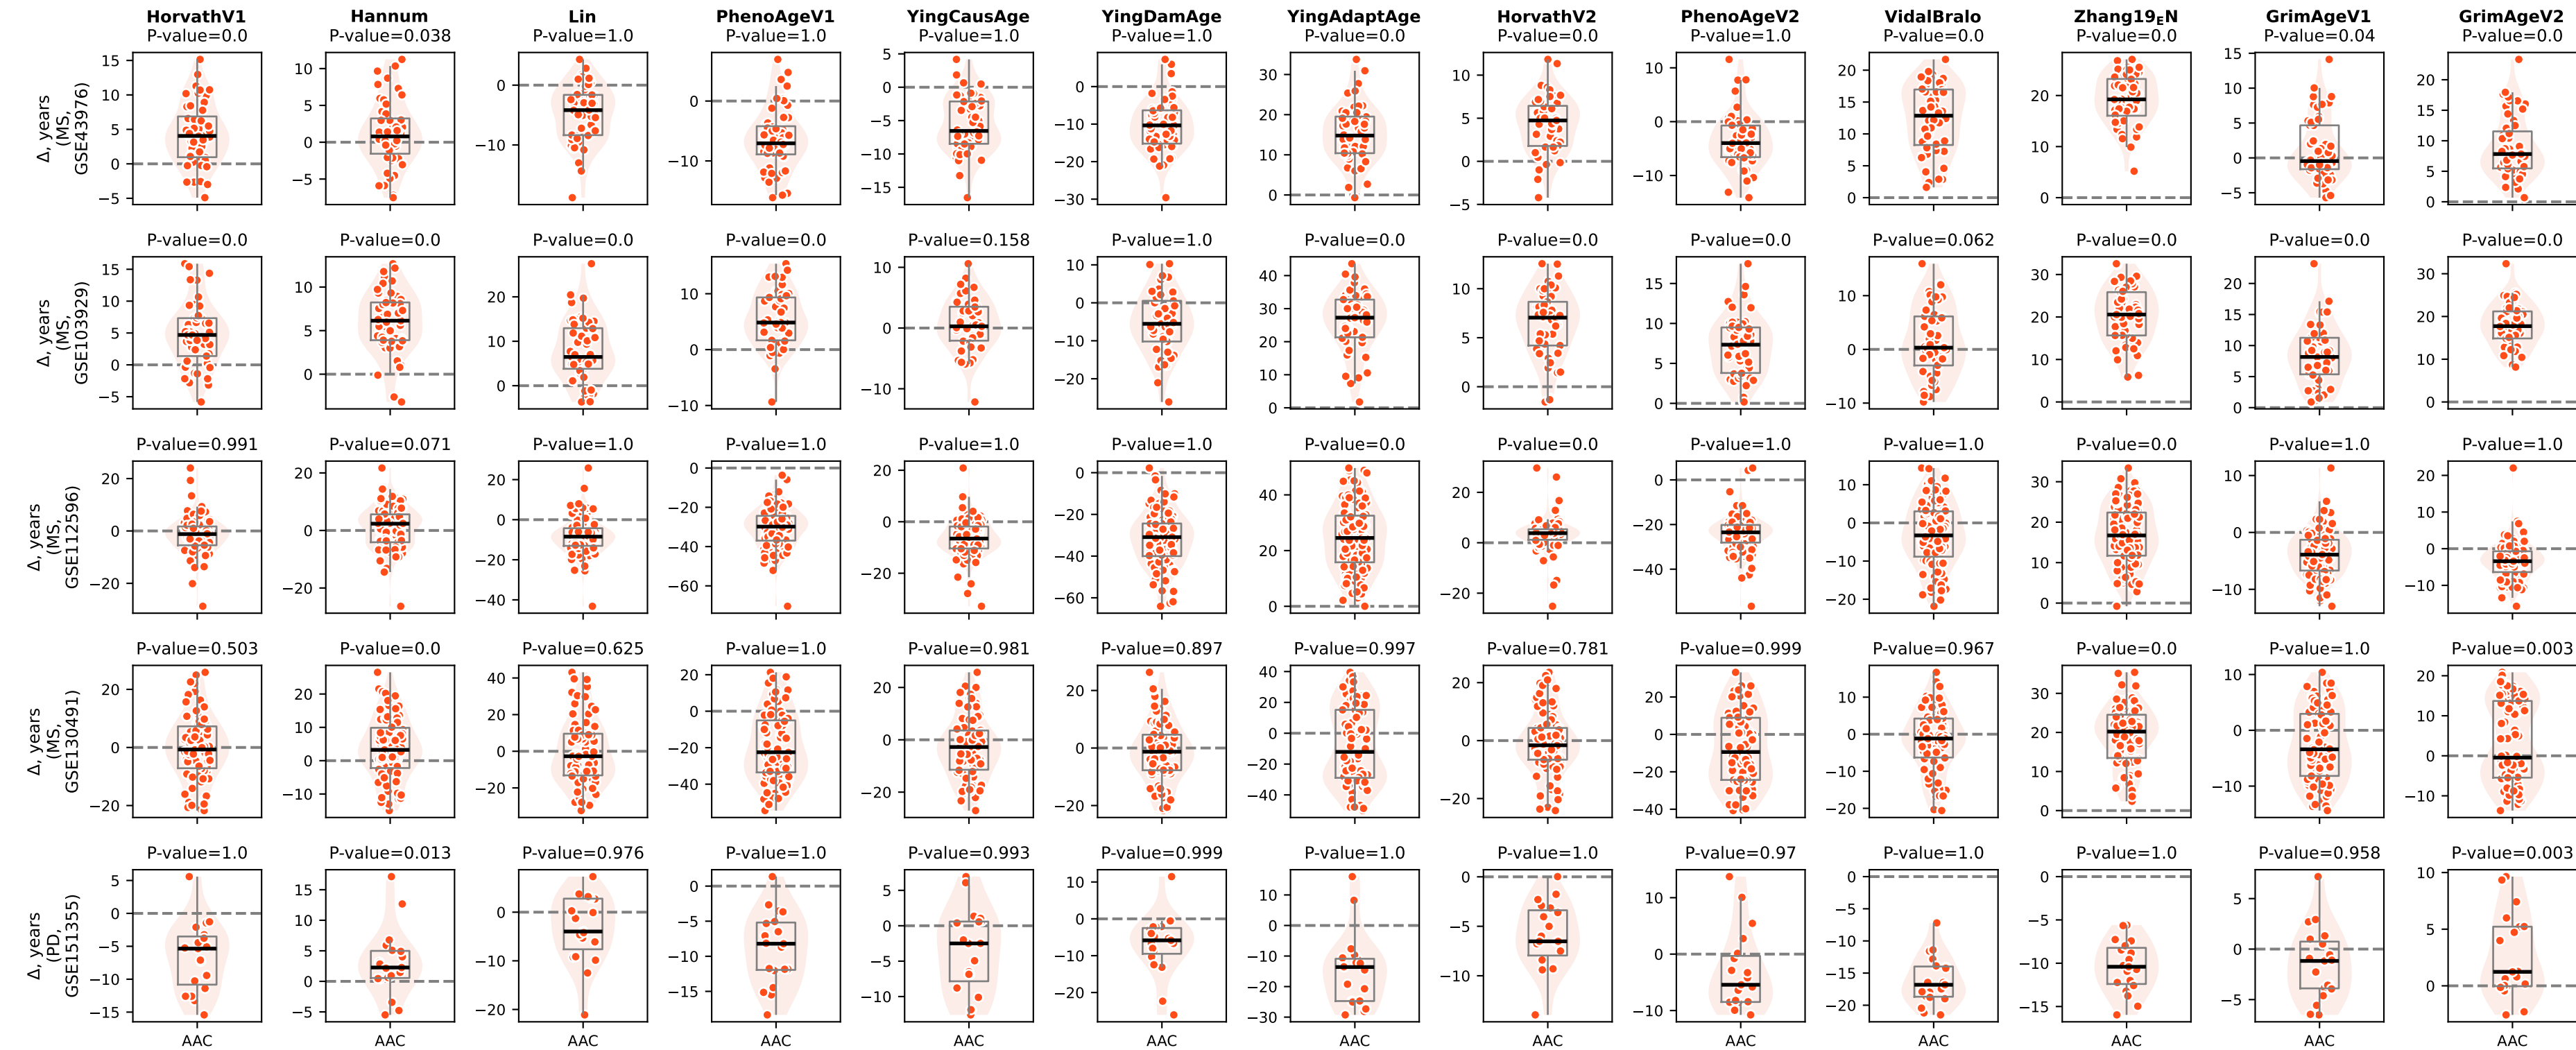

Supplement: supplementary_material [file attachment]

# AA2 - CVD

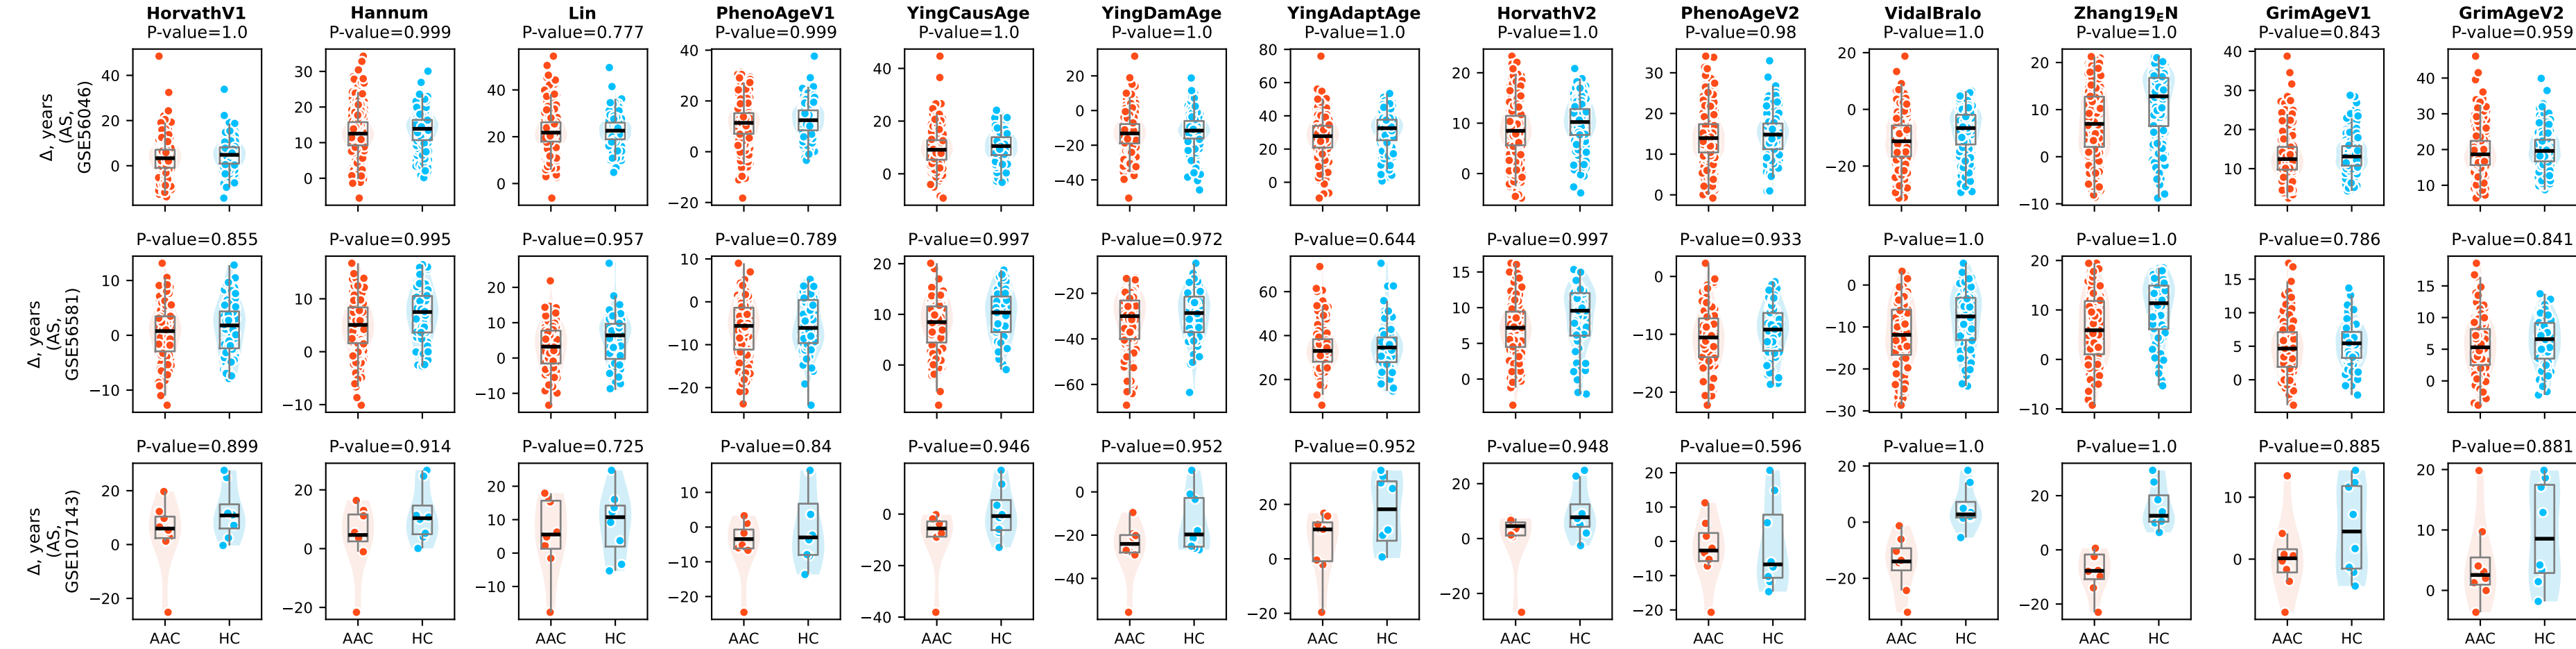

Supplement: supplementary_material [file attachment]

# AA1 - ISD

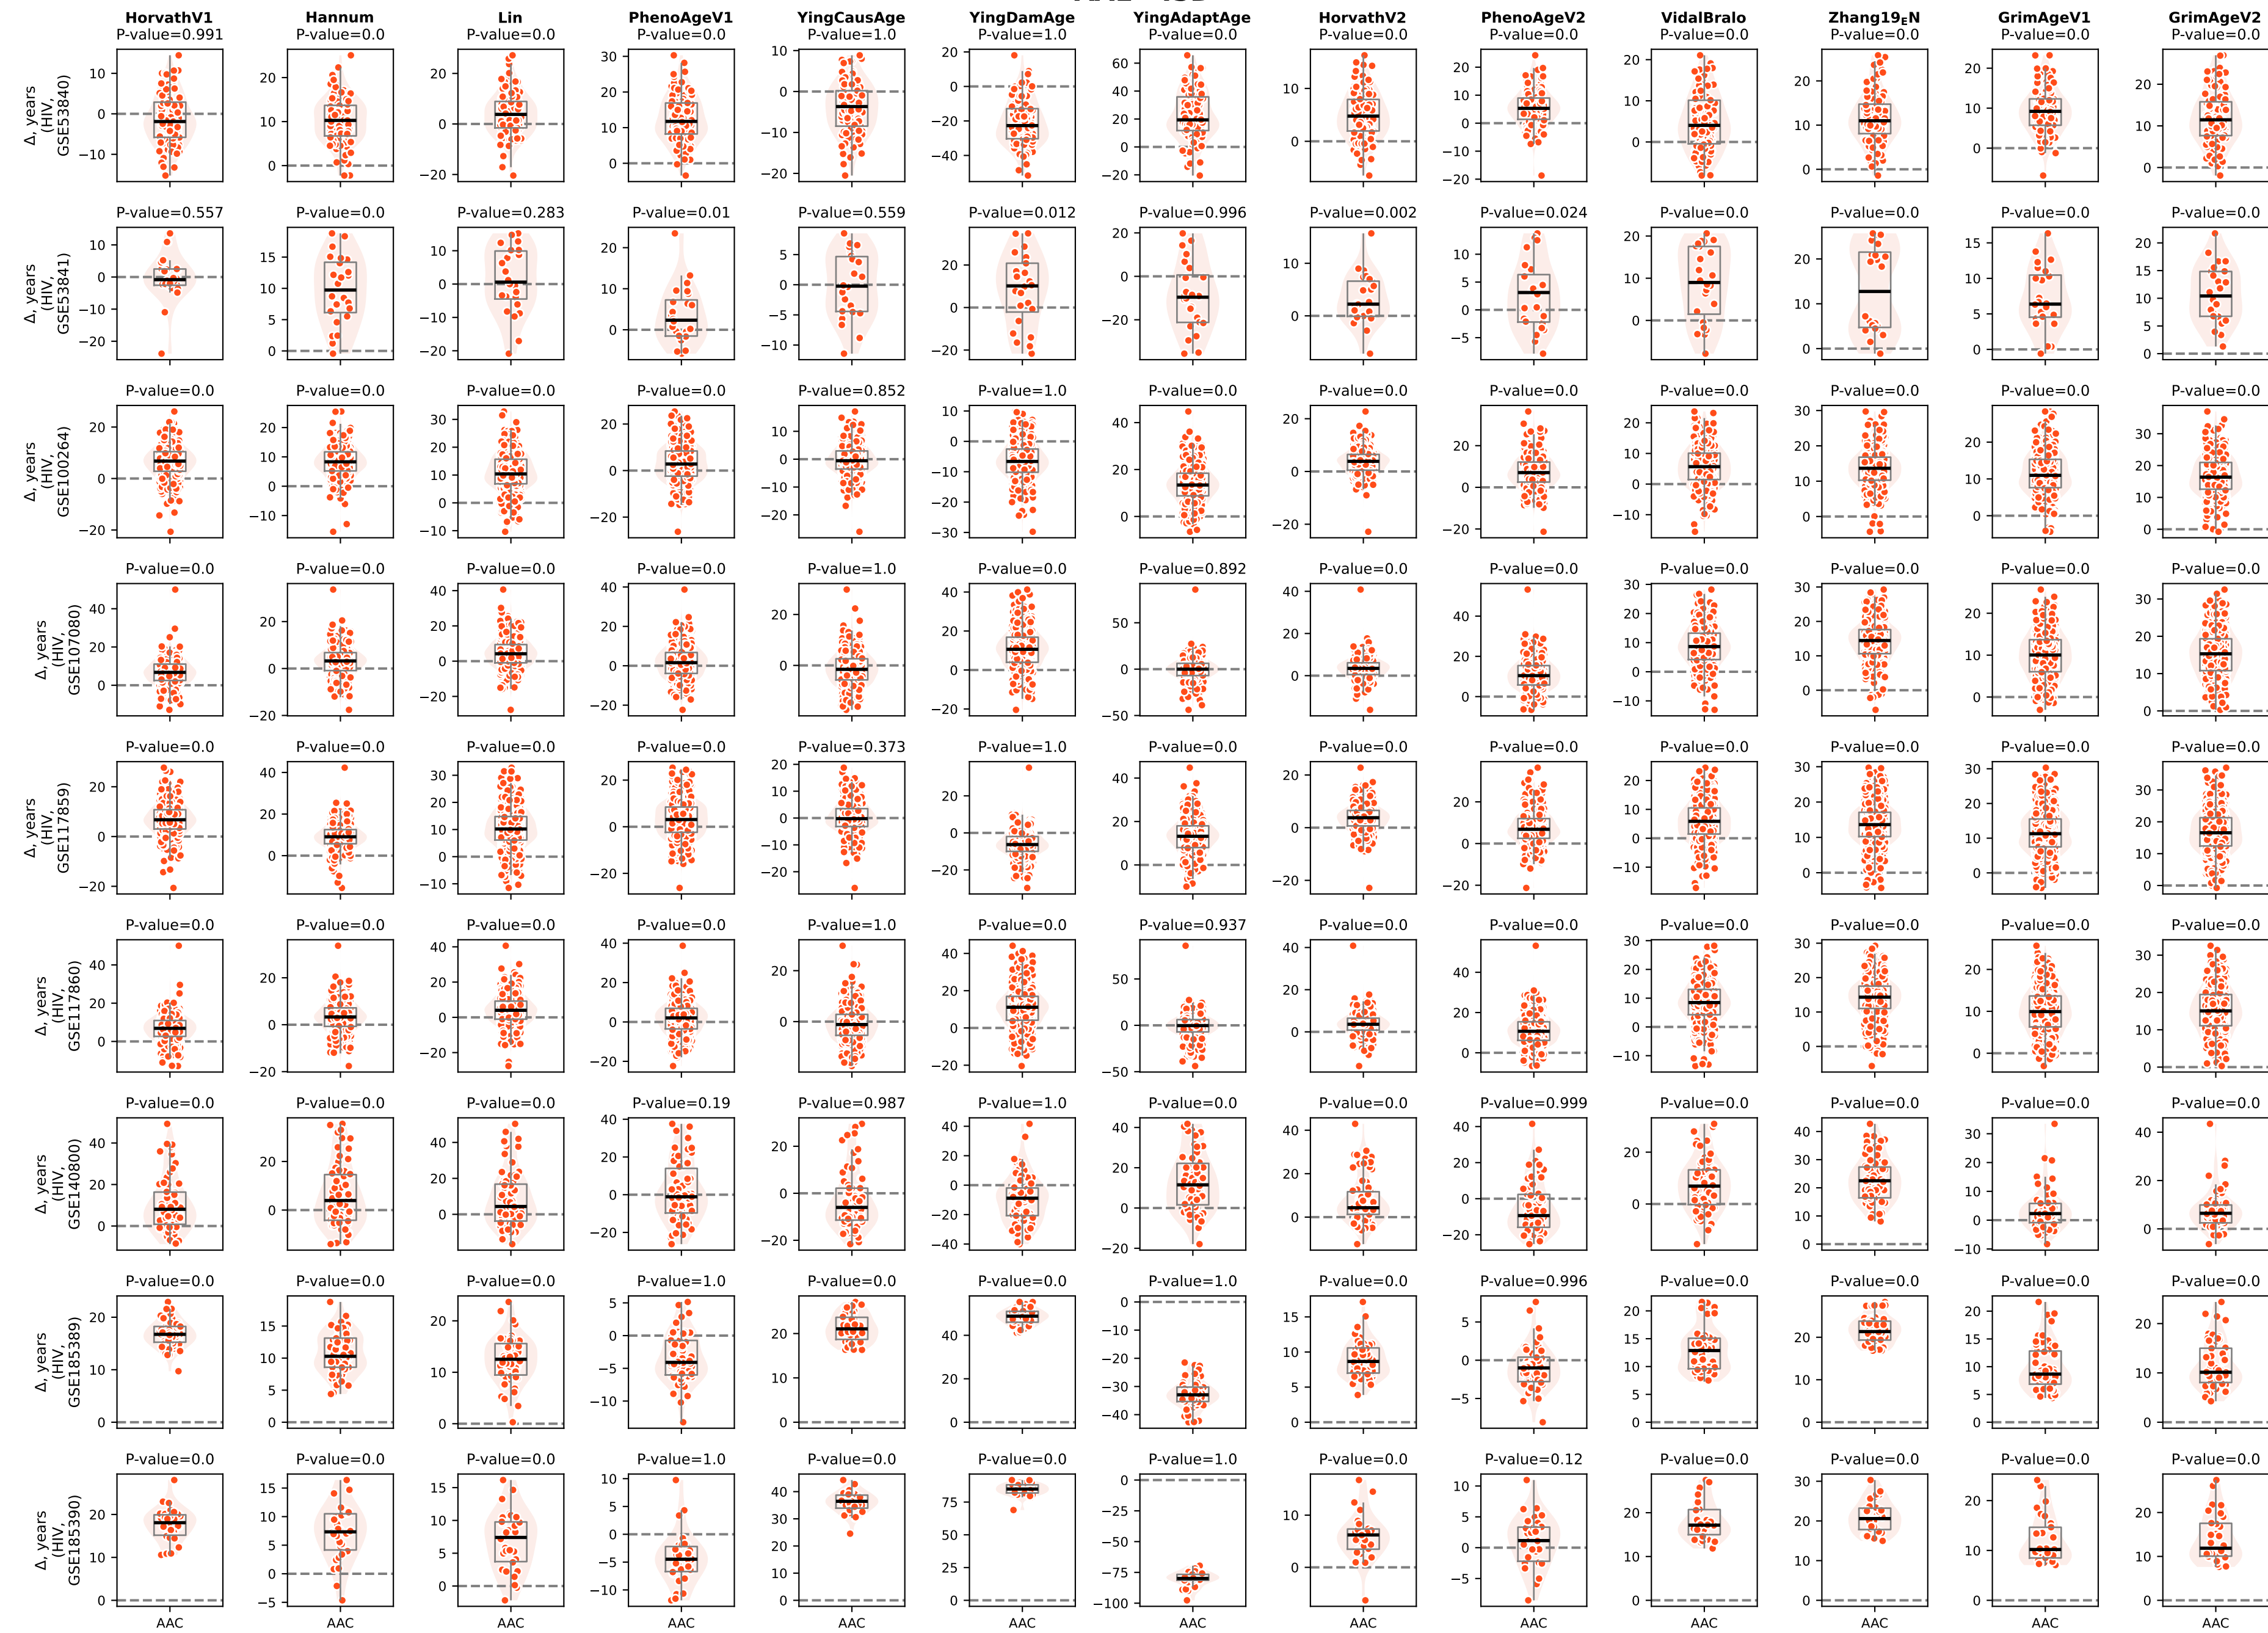

Supplement: supplementary_material [file attachment]

# AA2 - ISD

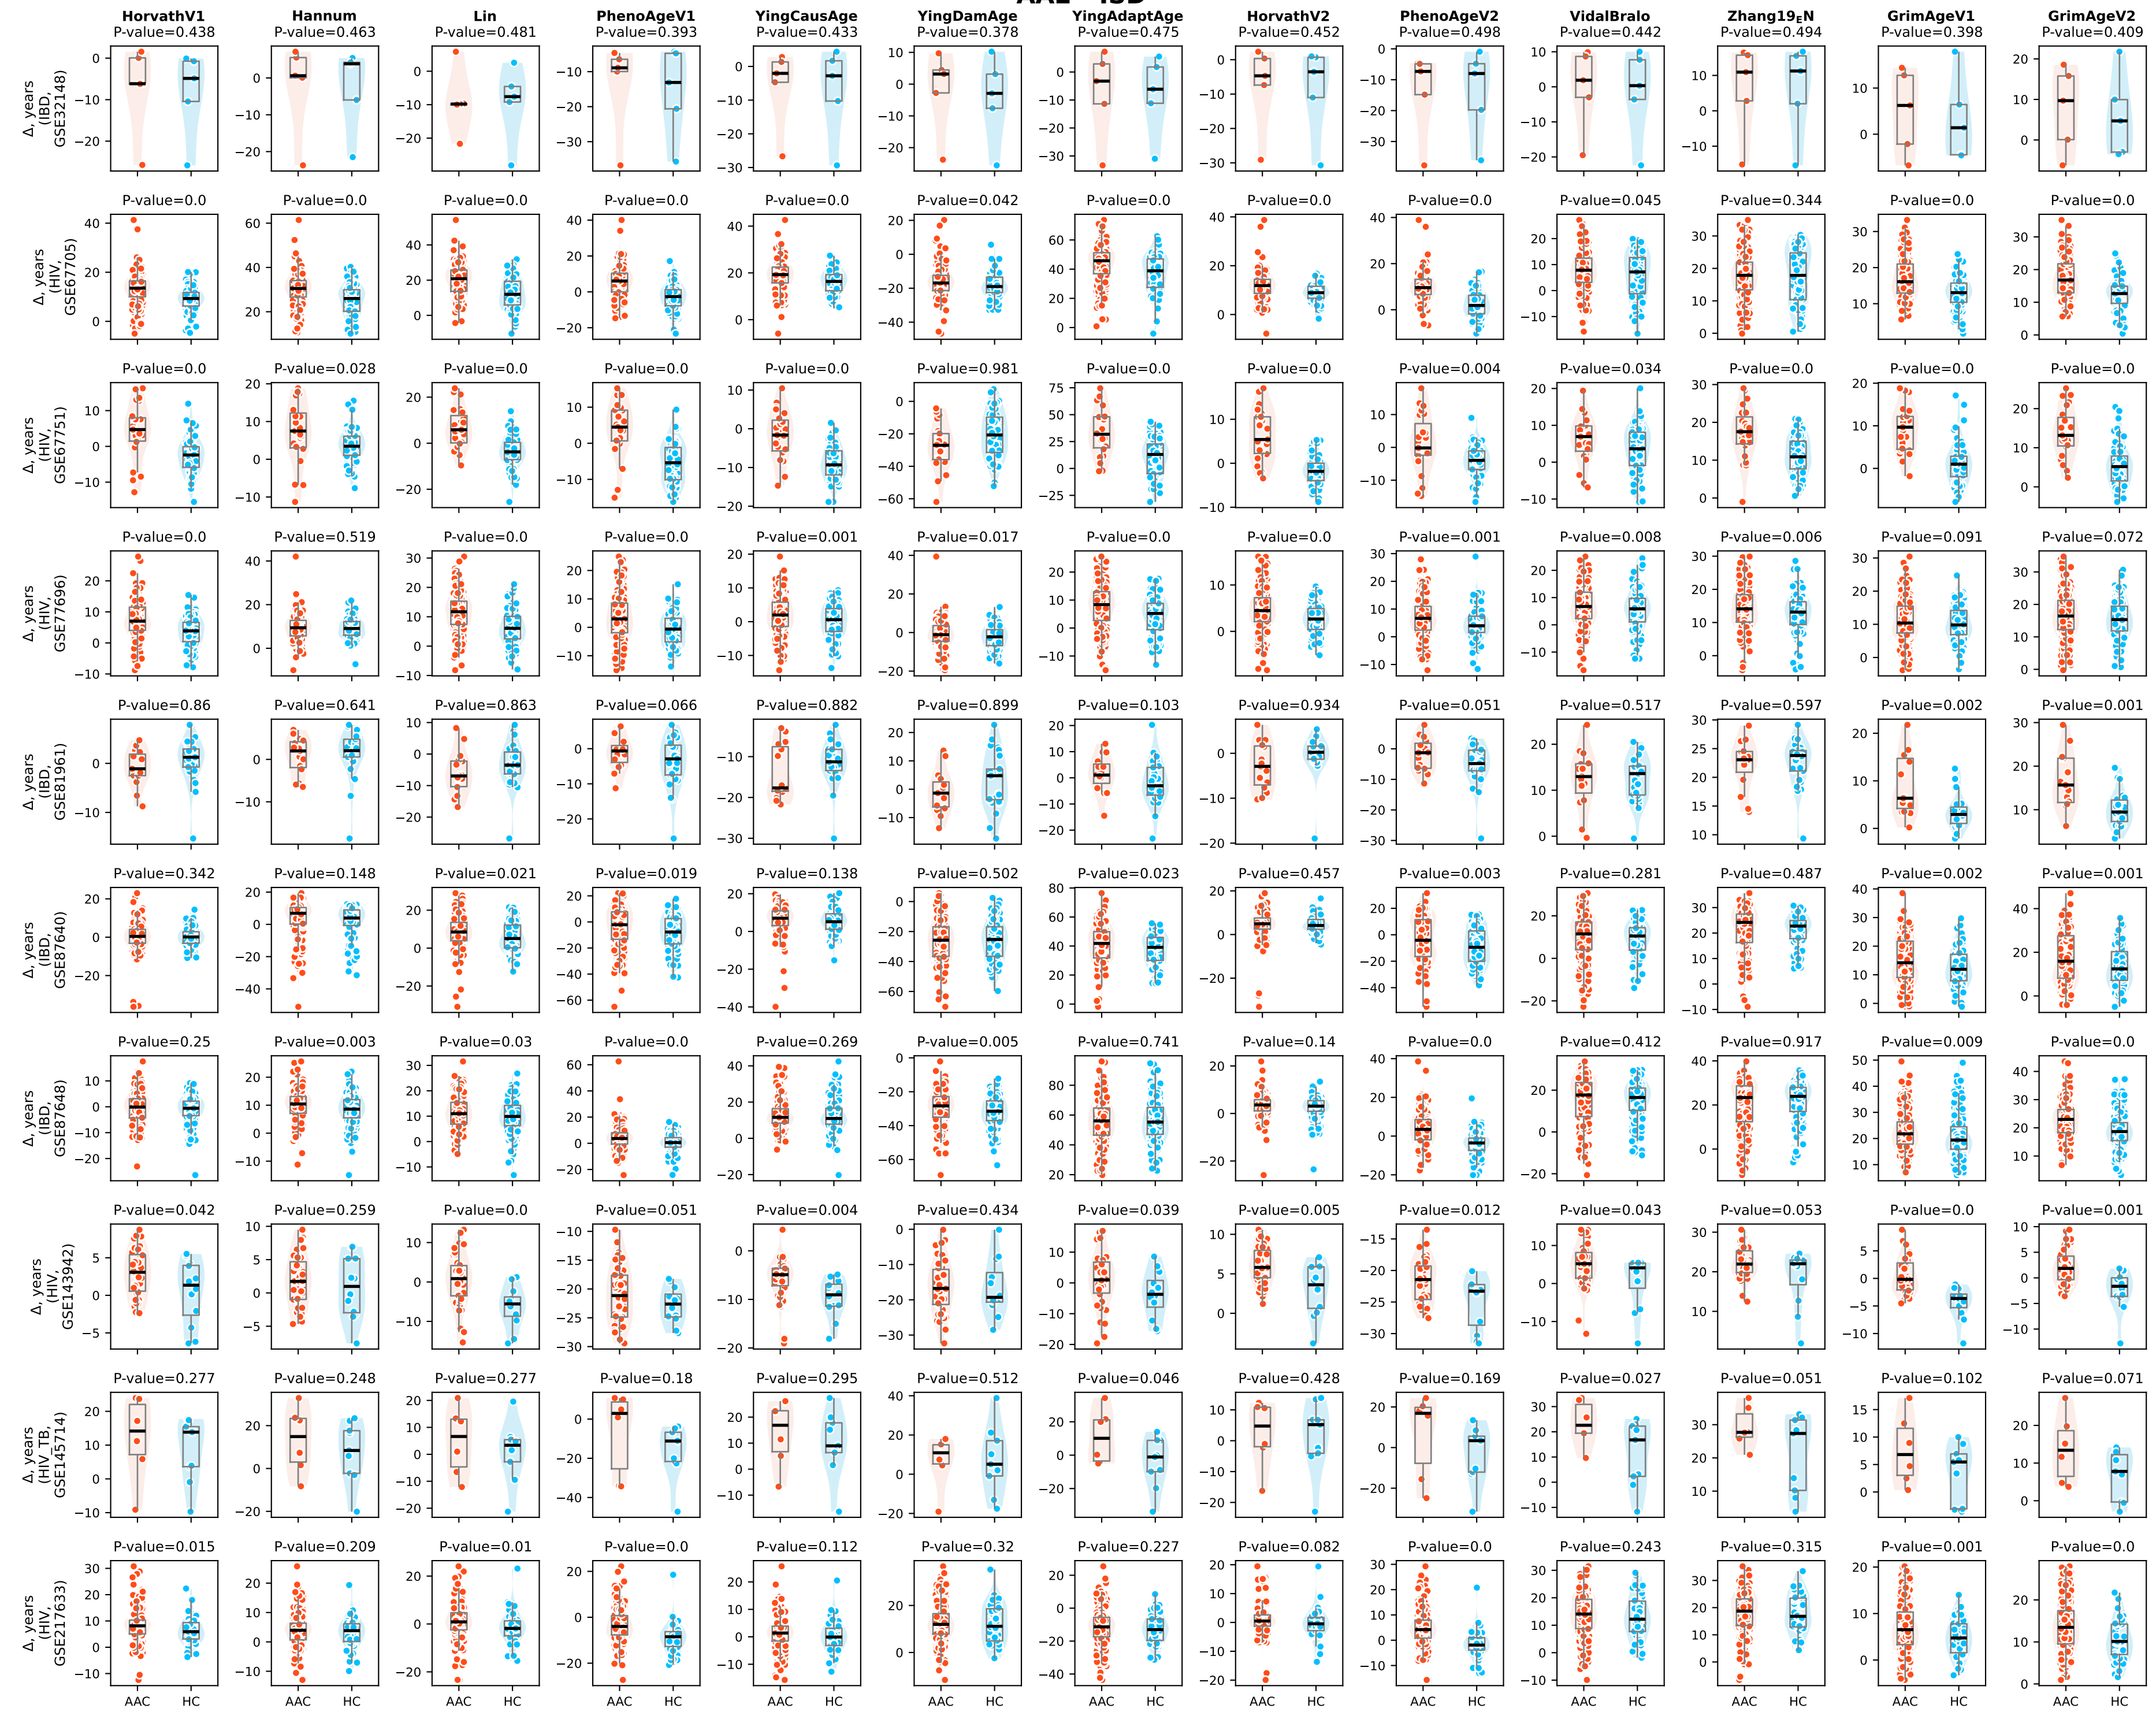

Supplement: supplementary_material [file attachment]

# AA1 - CVD

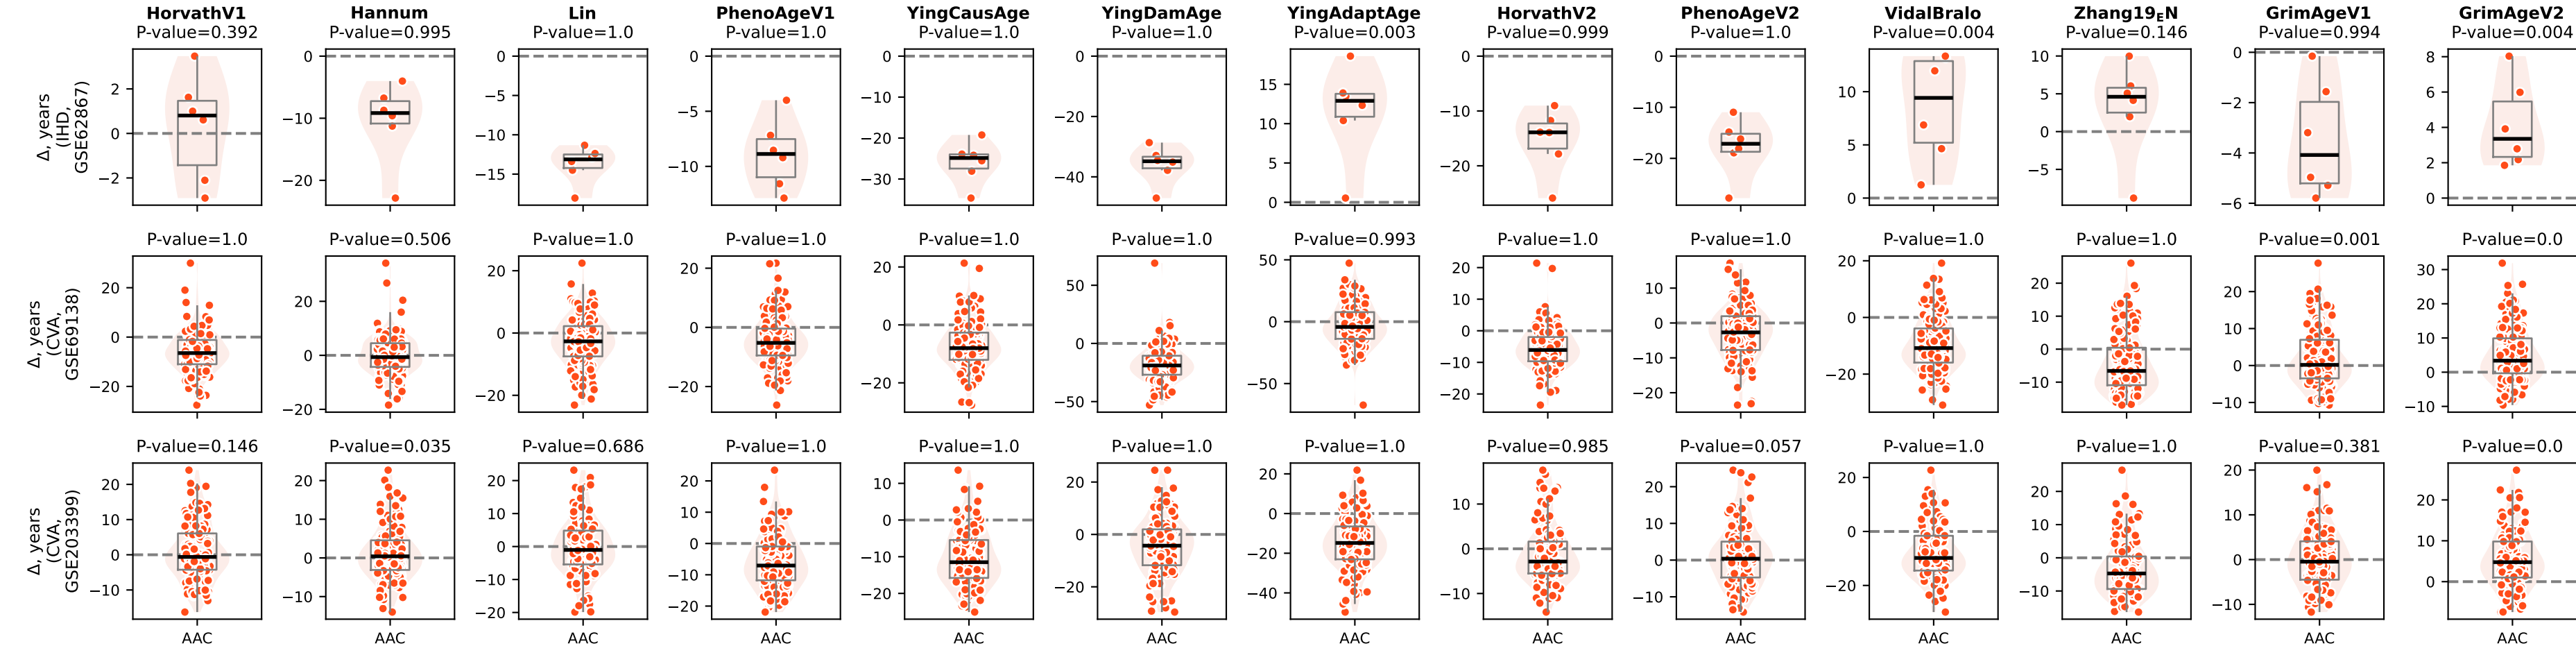

Supplement: supplementary_material [file attachment]

# AA2 - PGS

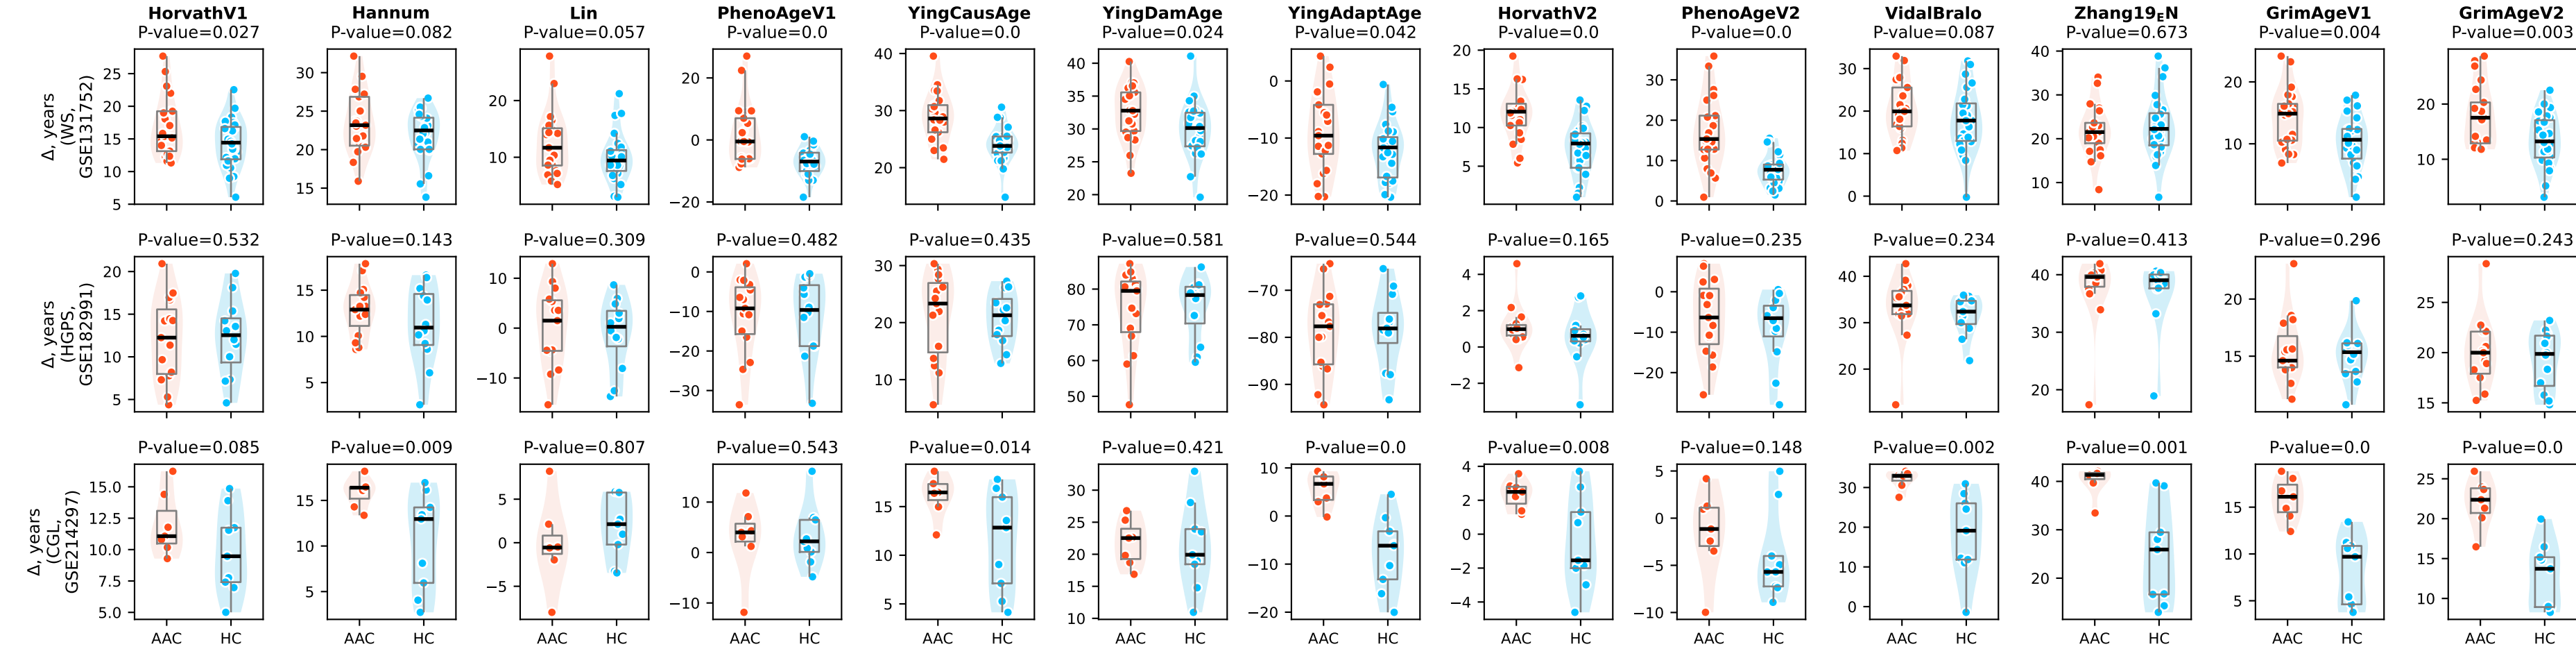

Supplement: supplementary_material [file attachment]
